# Supplementary material
Source: PubMed Central journal article supplement (PMC3475495)
Supplement: NIHMS404412-supplement-1_si_001.pdf [file NIHMS404412-supplement-1_si_001.pdf]

## HP35 Fast Dynamics for Folded and Urea-unfolded Conditions

Jean K. Chung, Megan C. Thielges<sup>#</sup>, Stephen R. Lynch, Michael D. Fayer<sup>\*</sup>  
Department of Chemistry, Stanford University, Stanford, CA 94305  
<sup>\*</sup>fayer@stanford.edu

### Supporting Information

#### 2D NMR Spectra

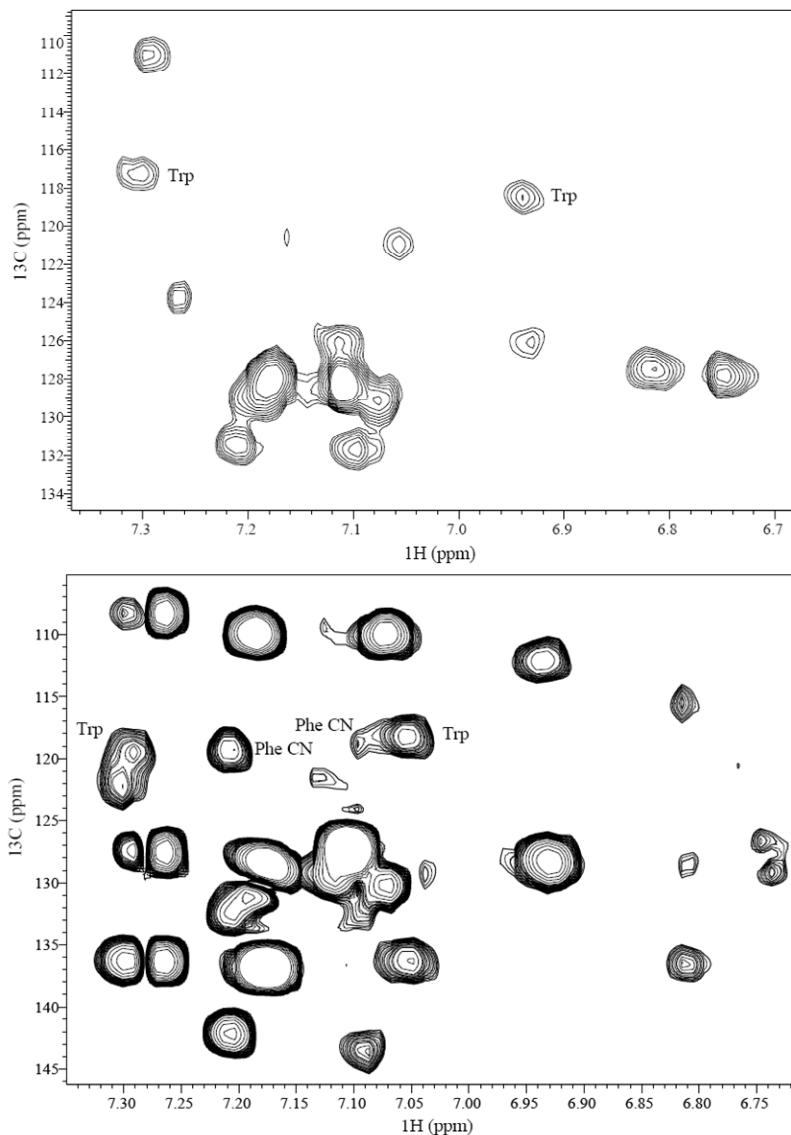

**Figure S1**  $^1\text{H}/^{13}\text{C}$  HSQC (top) and HMBC (bottom) NMR spectra of HP35- $\text{P}_2$ . The peaks at 118.0 and 118.3 ppm are not apparent in the HSQC, which means that the resonances are not directly attached to  $^1\text{H}$ . At the same time, they correlate to  $^1\text{H}$  in the HMBC from Phe and not

Trp. These observations indicate that the peaks are those of Phe-attached CN. HSQC spectrum was acquired with 1 scan of 2048 points in  $t_2$  and 100 points in  $t_1$  with an acquisition time of 0.17 s and a recycle delay of 1.5 s. HMBC spectrum was acquired with 32 scans of 2048 points in  $t_2$  and 180 points in  $t_1$  with an acquisition time of 0.17 s and recycle delay of 2 s.

| 1D $^{13}\text{C}$ (ppm) | HSQC (ppm) | HMBC (ppm) | Assignment      | Linewidth (Hz) | T2* (ms) |
|--------------------------|------------|------------|-----------------|----------------|----------|
| 107.2                    | -          | 107.4      | W               | 3.7            | 86       |
| 108.9                    | -          | 108.9      | F <sub>CN</sub> | 3.5            | 90       |
| 108.9                    | -          | 108.9      | F <sub>CN</sub> | 3.5            | 90       |
| 111.1                    | 111.3      | 111.1      |                 |                |          |
| 112.0                    |            |            |                 |                |          |
| 114.3                    |            | 114.6      | F (terminal)    | 0.5            | 630      |
| 116.7                    |            |            |                 | 0.4            | 800      |
| 117.3                    | 117.1      | 117.1      | W               | 20             | 16       |
| 118.0                    |            | 117.7      | CN              | 9              | 35       |
| 118.3                    |            | 118.3      | CN              | 13             | 24       |
| 118.6                    | 118.5      | 118.6      | W               | 23             | 14       |

**Table S1** Peak assignments from natural abundance 1D  $^{13}\text{C}$ ,  $^1\text{H}/^{13}\text{C}$  HSQC and HMBC spectra.
